# Supplementary material
Source: MDPI journal article supplement (https://www.mdpi.com/2073-445X/13/5/684)
Supplement: s1 [file s1]

## Supplementary Materials

Table S1a. XRF analysis of the standard reference material (SRM 2711a), %SR values (n=5), and detection limits.

| Metal | Mass (Da) | Measured value (mg.kg <sup>-1</sup> ) | Certified value (mg.kg <sup>-1</sup> ) | %SR |
|-------|-----------|---------------------------------------|----------------------------------------|-----|
| Cr    | 52        | 49.4 ± 4.1                            | 52.3 ± 2.9                             | 20  |
| Mn    | 55        | 600.0 ± 69.1                          | 675.0 ± 18                             | 20  |
| Fe    | 56        | 27,595.1 ± 478                        | 28,200.0 ± 400                         | 5   |
| Ni    | 59        | 20.6 ± 3.4                            | 21.7 ± 0.7                             | 23  |
| Cu    | 64        | 140.1 ± 42                            | 140.0 ± 2.0                            | 19  |
| Zn    | 65        | 397.8 ± 13.5                          | 414.0 ± 11                             | 11  |
| As    | 75        | 101.1 ± 2.1                           | 107.0 ± 5                              | 15  |
| Pb    | 207       | 1,366.2 ± 48                          | 1,400.0 ± 10                           | 8   |

Table S1b. Determination of detection limit (DL) and quantification limit (LOQ) of the standard reference material (SRM 2710a)

| Element | Background Intensidad | Standard Intensity | Standar Concentration | the count time (s) | DL (mg/kg) | LOQ (mg/kg) |
|---------|-----------------------|--------------------|-----------------------|--------------------|------------|-------------|
| Cr      | 1                     | 19                 | 23                    | 10                 | 1.13       | 3.73        |
| Mn      | 1                     | 415                | 2140                  | 10                 | 4.89       | 16.14       |
| Fe      | 68                    | 25,503             | 43300                 | 10                 | 13.27      | 43.79       |
| Ni      | 10                    | 12                 | 8                     | 10                 | 2.13       | 7.03        |
| Cu      | 270                   | 6,123              | 3420                  | 10                 | 8.71       | 28.74       |
| Zn      | 193                   | 9,187              | 4180                  | 10                 | 6.00       | 18.0        |
| As      | 1                     | 28,395             | 1540                  | 10                 | 0.05       | 0.17        |
| Pb      | 25                    | 22,851             | 5520                  | 10                 | 1.16       | 3.83        |

DL: Detection Limit

LQD: Quantification Limit

$$DL = \frac{3Ci}{Np} \sqrt{\frac{Nb}{t}}$$

DL, Ci, Nb, and t are the detection limit, the concentration of element ith, background count ratio, net count ratio, and the count time, respectively.

Limit of quantification (LOQ):

LOQ = 3,3 DL

Referencia:

Van Grieken, R., Markowicz, A., 2001. Handbook of X-ray Spectrometry. CRC press.

**Table S2. Pollution/ecological Indices, classification and interpretation.**

| Index           | IgeoO        | Interpretation               | Reference                                                                                                                                                                |
|-----------------|--------------|------------------------------|--------------------------------------------------------------------------------------------------------------------------------------------------------------------------|
| Igeo            | Igeo < 0     | No pollution                 | Muller, G. (1969). Index of geoaccumulation in sediments of the Rhine River. <i>GeoJournal</i> , 2, 108–118.                                                             |
|                 | 0 < Igeo < 1 | Slight pollution             |                                                                                                                                                                          |
|                 | 1 < Igeo < 2 | Partially moderate pollution |                                                                                                                                                                          |
|                 | 2 < Igeo <3  | Moderate pollution           |                                                                                                                                                                          |
|                 | 3 < Igeo < 4 | Partially serious pollution  |                                                                                                                                                                          |
|                 | 4 < Igeo < 5 | Serious pollution            |                                                                                                                                                                          |
|                 | Igeo > 5     | Severe pollution             |                                                                                                                                                                          |
|                 |              |                              |                                                                                                                                                                          |
| EF              | 0 < EF < 1   | No enrichment                | Sutherland, R.A. Bed Sediment-Associated Trace Metals in an Urban Stream, Oahu, Hawaii. <i>Cases Solut. Environ. Geol.</i> 2000, 39.                                     |
|                 | EF < 2       | Minimal enrichment           |                                                                                                                                                                          |
|                 | 2 < EF < 5   | Moderate enrichment          |                                                                                                                                                                          |
|                 | 5 < EF < 20  | Significant enrichment       |                                                                                                                                                                          |
|                 | 20 < EF < 40 | Very high enrichment         |                                                                                                                                                                          |
|                 | 40 < EF      | Extremely high enrichment    |                                                                                                                                                                          |
|                 |              |                              |                                                                                                                                                                          |
| PI              | PI < 1       | low level of pollution       | Wei, B.; Yang, L. A Review of Heavy Metal Contaminations in Urban Soils, Urban Road Dusts and Agricultural Soils from China. <i>Microchem. J.</i> 2010, 94, 99–107.      |
|                 | 1 ≤ PI <3    | moderate pollution           |                                                                                                                                                                          |
|                 | 3 ≤ PI       | Strong pollution             |                                                                                                                                                                          |
| Ecological Risk |              |                              |                                                                                                                                                                          |
| Ei              | < 40         | Low                          | Hakanson, L. An Ecological Risk Index for Aquatic Pollution Control.a Sedimentological Approach. <i>Water Res.</i> 1980, 14, 975–1001, doi:10.1016/0043-1354(80)90143-8. |
|                 | 40 – 80      | Moderate                     |                                                                                                                                                                          |
|                 | 80 – 160     | Considerate                  |                                                                                                                                                                          |
|                 | 160 – 320    | High                         |                                                                                                                                                                          |
|                 | >320         | Very high                    |                                                                                                                                                                          |
|                 |              |                              |                                                                                                                                                                          |
| RI              | < 150        | Low                          | Hakanson, L. An Ecological Risk Index for Aquatic Pollution Control.a Sedimentological Approach. <i>Water Res.</i> 1980, 14, 975–1001, doi:10.1016/0043-1354(80)90143-8. |
|                 | 150 – 300    | Moderate                     |                                                                                                                                                                          |
|                 | 300 – 600    | Considerate                  |                                                                                                                                                                          |
|                 | –            | High                         |                                                                                                                                                                          |
|                 | >600         | Very high                    |                                                                                                                                                                          |

**Table S3. Geographic location and physicochemical properties of La Mata, Dominican Republic.**

| Sample | Latitude | Longitude   | pH 1:2      | OM (%)      | CEC<br>meq/100 g<br>suelos | CE (μs/cm)  | % Sand       | % Silt       | % Clay       |
|--------|----------|-------------|-------------|-------------|----------------------------|-------------|--------------|--------------|--------------|
| LM01   | 19.11708 | -70.14789   | 5.66        | 4.04        | 12.41                      | 0.16        | 54.52        | 30.00        | 15.48        |
| LM02   | 19.11220 | -70.15800   | 5.31        | 6.43        | 15.41                      | 0.54        | 25.80        | 34.72        | 39.48        |
| LM03   | 19.10805 | -70.15202   | 6.13        | 4.49        | 12.17                      | 0.17        | 25.80        | 44.72        | 29.48        |
| LM04   | 19.10494 | -70.15487   | 6.18        | 4.84        | 14.56                      | 0.22        | 27.80        | 36.72        | 35.48        |
| LM05   | 19.11873 | -70.15013   | 5.96        | 3.28        | 16.80                      | 0.25        | 25.80        | 28.72        | 45.48        |
| LM06   | 19.11406 | -70.15317   | 6.74        | 2.80        | 15.41                      | 0.23        | 17.80        | 34.00        | 48.20        |
| LM07   | 19.10998 | -70.15534   | 5.55        | 5.15        | 12.92                      | 0.18        | 23.80        | 50.72        | 25.48        |
| LM08   | 19.10722 | -70.15940   | 5.57        | 4.71        | 15.18                      | 0.39        | 14.52        | 36.00        | 49.48        |
| LM09   | 19.12073 | -70.15379   | 5.48        | 5.46        | 13.72                      | 0.28        | 19.80        | 34.00        | 46.20        |
| LM10   | 19.11565 | -70.15572   | 6.01        | 4.07        | 15.16                      | 0.33        | 22.52        | 30.00        | 47.48        |
| LM11   | 19.11220 | -70.14898   | 5.81        | 4.11        | 13.47                      | 0.22        | 19.80        | 34.00        | 46.20        |
| LM12   | 19.12248 | -70.15681   | 5.85        | 4.39        | 15.86                      | 0.47        | 20.52        | 25.28        | 54.20        |
| LM13   | 19.11771 | -70.15816   | 6.00        | 4.39        | 15.18                      | 0.27        | 17.80        | 36.72        | 45.48        |
| LM14   | 19.11359 | -70.16118   | 5.32        | 5.46        | 12.94                      | 0.24        | 18.52        | 32.00        | 49.48        |
| LM15   | 19.10929 | -70.16290   | 5.08        | 4.39        | 13.07                      | 0.41        | 16.52        | 34.00        | 49.48        |
| LM16   | 19.12358 | -70.15882   | 5.74        | 6.53        | 18.63                      | 0.54        | 18.52        | 36.00        | 45.48        |
| LM17   | 19.11891 | -70.16116   | 5.59        | 4.82        | 14.00                      | 0.34        | 23.80        | 26.72        | 49.48        |
| LM18   | 19.11517 | -70.16390   | 5.48        | 2.24        | 13.79                      | 0.37        | 22.52        | 26.00        | 51.48        |
| LM19   | 19.11100 | -70.16575   | 5.73        | 6.11        | 15.30                      | 0.38        | 28.52        | 30.00        | 41.48        |
| LM20   | 19.11296 | -70.16895   | 5.56        | 4.60        | 13.56                      | 0.39        | 20.52        | 26.00        | 53.48        |
| LM21   | 19.12307 | -70.16808   | 5.94        | 5.73        | 15.92                      | 0.21        | 19.80        | 32.00        | 48.20        |
| LM22   | 19.11801 | -70.17001   | 6.31        | 3.01        | 15.52                      | 0.22        | 21.80        | 28.00        | 50.20        |
| LM23   | 19.11801 | -70.17001   | 5.74        | 4.84        | 14.24                      | 0.20        | 20.52        | 27.28        | 52.20        |
| LM24   | 19.11614 | -70.17310   | 5.23        | 5.88        | 13.20                      | 0.23        | 24.52        | 22.00        | 53.48        |
| LM25   | 19.11359 | -70.17545   | 5.72        | 3.76        | 12.95                      | 0.16        | 22.52        | 26.00        | 51.48        |
| LM26   | 19.11423 | -70.17661   | 5.57        | 4.28        | 13.65                      | 0.17        | 20.52        | 26.00        | 53.48        |
| LM27   | 19.12107 | -70.17018   | 5.77        | 4.80        | 16.35                      | 0.25        | 13.08        | 34.72        | 52.20        |
| LM28   | 19.11161 | -70.17934   | 6.12        | 3.76        | 13.47                      | 0.14        | 29.24        | 31.28        | 39.48        |
| LM29   | 19.13248 | -70.17702   | 5.81        | 3.72        | 17.60                      | 0.15        | 21.2         | 33.3         | 45.5         |
| LM30   | 19.12782 | -70.17969   | 6.96        | 2.59        | 29.95                      | 0.22        | 17.2         | 33.3         | 49.5         |
| LM31   | 19.12272 | -70.18023   | 5.88        | 1.64        | 14.85                      | 0.09        | 15.2         | 32.0         | 52.8         |
| LM32   | 19.11811 | -70.18340   | 5.87        | 3.83        | 10.63                      | 0.18        | 29.2         | 36.0         | 34.8         |
|        |          | <b>MIN</b>  | <b>5.08</b> | <b>1.64</b> | <b>10.63</b>               | <b>0.09</b> | <b>13.08</b> | <b>22.00</b> | <b>15.48</b> |
|        |          | <b>MAX</b>  | <b>6.96</b> | <b>6.53</b> | <b>29.95</b>               | <b>0.54</b> | <b>54.52</b> | <b>50.72</b> | <b>54.20</b> |
|        |          | <b>MEAN</b> | <b>5.80</b> | <b>4.38</b> | <b>14.93</b>               | <b>0.27</b> | <b>22.51</b> | <b>32.13</b> | <b>45.37</b> |
|        |          | <b>SDT</b>  | <b>0.40</b> | <b>1.17</b> | <b>3.20</b>                | <b>0.12</b> | <b>7.19</b>  | <b>5.73</b>  | <b>8.92</b>  |

\*STD standard deviation

Table S4. Total heavy metal concentrations in surface soils of La Mata, Dominican Republic.

| Sample | Latitude | Longitude | Fe        | Mn      | Cr     | Cu    | Ni     | Zn     | Pb    | As   |
|--------|----------|-----------|-----------|---------|--------|-------|--------|--------|-------|------|
|        |          |           | mg/kg     |         |        |       |        |        |       |      |
| LM01   | 19.11708 | -70.14789 | 53400.5   | 3396.1  | 644.3  | 50.5  | 179.3  | 382.1  | 40.2  | 5.6  |
| LM02   | 19.11220 | -70.14898 | 72065.5   | 4682.8  | 344.5  | 13.9  | 5.1    | 222.6  | 43.9  | 4.8  |
| LM03   | 19.10805 | -70.15202 | 65849.4   | 3463.6  | 673.1  | 37.8  | 57.5   | 518.0  | 32.3  | 5.0  |
| LM04   | 19.10494 | -70.15487 | 95053.6   | 7340.0  | 673.5  | 6.4   | 73.5   | 389.4  | 34.5  | 5.3  |
| LM05   | 19.11873 | -70.15013 | 76888.7   | 4781.7  | 427.5  | 33.7  | 5.7    | 29.8   | 40.5  | 4.8  |
| LM06   | 19.11406 | -70.15317 | 65484.4   | 169.9   | 427.8  | 45.7  | 12.0   | 79.6   | 47.2  | 4.6  |
| LM07   | 19.10998 | -70.15534 | 66689.4   | 3584.2  | 700.4  | 36.2  | 56.4   | 577.6  | 29.5  | 5.5  |
| LM08   | 19.10722 | -70.15940 | 69662.5   | 664.4   | 410.7  | 38.1  | 15.1   | 264.5  | 40.0  | 5.0  |
| LM09   | 19.12073 | -70.15379 | 70803.4   | 262.2   | 366.8  | 45.3  | 3.7    | 50.5   | 46.5  | 4.8  |
| LM10   | 19.11565 | -70.15572 | 61297.6   | 399.1   | 311.6  | 33.0  | 10.3   | 119.4  | 37.7  | 4.7  |
| LM11   | 19.11220 | -70.15800 | 61577.0   | 345.0   | 294.5  | 56.8  | 7.4    | 150.9  | 40.1  | 5.1  |
| LM12   | 19.12248 | -70.15681 | 83258.5   | 557.2   | 321.8  | 26.9  | 9.0    | 129.9  | 40.9  | 4.8  |
| LM13   | 19.11771 | -70.15816 | 81229.6   | 443.9   | 332.1  | 50.3  | 3.2    | 77.7   | 33.2  | 4.7  |
| LM14   | 19.11359 | -70.16118 | 68414.3   | 226.6   | 292.6  | 31.7  | 12.4   | 44.1   | 33.3  | 5.1  |
| LM15   | 19.10929 | -70.16290 | 64607.9   | 597.3   | 323.1  | 56.3  | 12.8   | 22.6   | 34.2  | 4.7  |
| LM16   | 19.12358 | -70.15882 | 71649.4   | 619.4   | 335.6  | 72.7  | 8.9    | 316.9  | 35.3  | 4.6  |
| LM17   | 19.11891 | -70.16116 | 85224.4   | 1530.5  | 357.6  | 37.1  | 0.0    | 206.5  | 42.4  | 5.7  |
| LM18   | 19.11517 | -70.16390 | 98024.0   | 2111.4  | 400.6  | 44.5  | 9.2    | 75.6   | 46.9  | 5.0  |
| LM19   | 19.11100 | -70.16575 | 72448.2   | 2552.7  | 285.0  | 52.3  | 19.3   | 210.1  | 23.9  | 5.3  |
| LM20   | 19.11296 | -70.16895 | 98449.1   | 628.2   | 329.0  | 47.8  | 11.8   | 274.2  | 42.8  | 5.1  |
| LM21   | 19.12749 | -70.16627 | 69122.7   | 544.9   | 421.0  | 2.0   | 0.0    | 45.8   | 29.0  | 4.9  |
| LM22   | 19.12307 | -70.16808 | 82209.5   | 1435.4  | 386.2  | 18.7  | 0.0    | 31.7   | 58.5  | 2.9  |
| LM23   | 19.11971 | -70.17089 | 84730.6   | 1592.7  | 379.5  | 11.3  | 0.0    | 28.6   | 71.6  | 2.6  |
| LM24   | 19.11614 | -70.17310 | 100708.2  | 1913.2  | 379.5  | 7.5   | 0.0    | 29.3   | 67.0  | 3.6  |
| LM25   | 19.12869 | -70.17086 | 93753.2   | 2033.0  | 358.0  | 31.0  | 0.0    | 510.8  | 67.6  | 5.5  |
| LM26   | 19.12558 | -70.17295 | 68939.4   | 470.1   | 354.6  | 2.0   | 0.0    | 97.7   | 52.6  | 5.1  |
| LM27   | 19.12152 | -70.17551 | 68461.5   | 297.8   | 553.1  | 6.7   | 0.0    | 201.3  | 50.6  | 4.9  |
| LM28   | 19.11703 | -70.17804 | 62112.5   | 452.3   | 709.3  | 16.2  | 0.0    | 287.2  | 48.9  | 4.8  |
| LM29   | 19.13248 | -70.17702 | 63841.87  | 484.50  | 531.4  | 53.1  | 0.0    | 238.0  | 39.8  | 5.7  |
| LM30   | 19.12782 | -70.17969 | 66343.43  | 2297.50 | 501.6  | 34.7  | 118.2  | 537.4  | 43.3  | 5.1  |
| LM31   | 19.12272 | -70.18023 | 68698.93  | 1571.80 | 314.1  | 53.8  | 0.0    | 64.7   | 46.3  | 4.6  |
| LM32   | 19.11811 | -70.18340 | 48520.63  | 250.20  | 488.7  | 29.9  | 0.0    | 188.2  | 26.9  | 4.8  |
|        |          | MIN       | 48520.63  | 169.90  | 285.00 | 2.00  | 0.00   | 22.63  | 23.90 | 2.56 |
|        |          | MAX       | 100708.17 | 7340.00 | 709.30 | 72.65 | 179.27 | 577.57 | 71.60 | 5.67 |
|        |          | MEAN      | 73735.00  | 1615.60 | 425.90 | 33.86 | 19.71  | 200.09 | 42.73 | 4.83 |
|        |          | STD       | 13109.12  | 1690.53 | 129.78 | 18.46 | 39.05  | 166.71 | 11.46 | 0.69 |

\*STD standard deviation

**Table S5. Descriptive statistics of pH, % Organic Matter (OM), and the heavy metal concentrations of local background samples in soils La Mata, Dominican Republic (n=4).**

| Sample | Latitude | Longitude | pH   | MO   | Fe      | Mn   | Cr  | Cu   | Ni   | Zn    | Pb   | As  |
|--------|----------|-----------|------|------|---------|------|-----|------|------|-------|------|-----|
|        |          |           |      | (%)  | (mg/kg) |      |     |      |      |       |      |     |
| F1     | 19.11038 | -70.14922 | 6.17 | 2.52 | 66504   | 407  | 539 | 8    | 7    | 195   | 51   | 5   |
| F2     | 19.12511 | -70.15851 | 6.37 | 1.22 | 66295   | 1451 | 449 | 47   | 10   | 280   | 43   | 5   |
| F3     | 19.11257 | -70.17149 | 6.10 | 2.41 | 32347   | 140  | 258 | 11   | 9    | 70    | 17   | 2   |
| F4     | 19.12484 | -70.18334 | 6.34 | 1.68 | 62517   | 3549 | 422 | 42   | 12   | 315   | 42   | 4   |
| MIN    |          |           | 6.10 | 1.22 | 32347   | 140  | 258 | 8.0  | 7.0  | 70.0  | 17.0 | 2.0 |
| MAX    |          |           | 6.37 | 2.52 | 66504   | 3549 | 539 | 47.0 | 12.0 | 315.0 | 51.0 | 5.0 |
| MEAN   |          |           | 6.25 | 1.96 | 56916   | 1387 | 417 | 27.0 | 9.5  | 215.0 | 38.3 | 4.0 |
| STD    |          |           | 0.13 | 0.62 | 16481   | 1549 | 117 | 20.3 | 2.1  | 109.0 | 14.7 | 1.4 |

\*STD standard deviation

Table S6. Geo-accumulation Index (Igeo) in surface soils of La Mata, Dominican Republic, using LB as background.

| Sample | Mn    | Cr    | Cu    | Ni    | Zn    | Pb    | As    |
|--------|-------|-------|-------|-------|-------|-------|-------|
| LM01   | 0.71  | 0.04  | 1.42  | 3.65  | 0.24  | -0.51 | -0.09 |
| LM02   | 1.17  | -0.86 | -1.55 | -1.50 | -0.53 | -0.39 | -0.31 |
| LM03   | 0.74  | 0.11  | -0.10 | 2.01  | 0.68  | -0.83 | -0.26 |
| LM04   | 1.82  | 0.11  | -2.66 | 2.37  | 0.27  | -0.73 | -0.19 |
| LM05   | 1.20  | -0.55 | -0.27 | -1.32 | -3.44 | -0.50 | -0.32 |
| LM06   | -3.61 | -0.55 | 0.17  | -0.25 | -2.02 | -0.28 | -0.39 |
| LM07   | 0.78  | 0.16  | -0.16 | 1.98  | 0.84  | -0.96 | -0.13 |
| LM08   | -1.65 | -0.61 | -0.09 | 0.09  | -0.29 | -0.52 | -0.25 |
| LM09   | -2.99 | -0.77 | 0.16  | -1.96 | -2.67 | -0.30 | -0.31 |
| LM10   | -2.38 | -1.01 | -0.30 | -0.47 | -1.43 | -0.61 | -0.36 |
| LM11   | -2.59 | -1.09 | 0.49  | -0.96 | -1.10 | -0.52 | -0.23 |
| LM12   | -1.90 | -0.96 | -0.59 | -0.67 | -1.31 | -0.49 | -0.32 |
| LM13   | -2.23 | -0.91 | 0.31  | -2.15 | -2.05 | -0.79 | -0.35 |
| LM14   | -3.20 | -1.10 | -0.35 | -0.20 | -2.87 | -0.78 | -0.23 |
| LM15   | -1.80 | -0.95 | 0.47  | -0.15 | -3.83 | -0.75 | -0.35 |
| LM16   | -1.75 | -0.90 | 0.84  | -0.68 | -0.03 | -0.70 | -0.37 |
| LM17   | -0.44 | -0.81 | -0.13 | –     | -0.64 | -0.44 | -0.08 |
| LM18   | 0.02  | -0.64 | 0.14  | -0.63 | -2.09 | -0.29 | -0.27 |
| LM19   | 0.30  | -1.13 | 0.37  | 0.44  | -0.62 | -1.26 | -0.19 |
| LM20   | -1.73 | -0.93 | 0.24  | -0.27 | -0.23 | -0.42 | -0.23 |
| LM21   | -1.93 | -0.57 | -4.34 | –     | -2.82 | -0.99 | -0.28 |
| LM22   | -0.54 | -0.70 | -1.11 | –     | -3.35 | 0.03  | -1.07 |
| LM23   | -0.39 | -0.72 | -1.85 | –     | -3.50 | 0.32  | -1.23 |
| LM24   | -0.12 | -0.72 | -2.43 | –     | -3.46 | 0.22  | -0.74 |
| LM25   | -0.03 | -0.81 | -0.39 | –     | 0.66  | 0.24  | -0.12 |
| LM26   | -2.15 | -0.82 | -4.34 | –     | -1.72 | -0.13 | -0.24 |
| LM27   | -2.80 | -0.18 | -2.60 | –     | -0.68 | -0.18 | -0.29 |
| LM28   | -2.20 | 0.18  | -1.32 | –     | -0.17 | -0.23 | -0.32 |
| LM29   | -2.10 | -0.24 | 0.39  | –     | -0.44 | -0.53 | -0.08 |
| LM30   | 0.14  | -0.32 | -0.22 | 3.05  | 0.74  | -0.40 | -0.24 |
| LM31   | -0.40 | -0.99 | 0.41  | –     | -2.32 | -0.31 | -0.39 |
| LM32   | -3.06 | -0.36 | -0.44 | –     | -0.78 | -1.09 | -0.31 |
| MIN    | -3.61 | -1.13 | -4.34 | -2.15 | -3.83 | -1.26 | -1.23 |
| MAX    | 1.82  | 0.18  | 1.42  | 3.65  | 0.84  | 0.32  | -0.08 |
| MEAN   | -1.10 | -0.61 | -0.62 | 0.12  | -1.28 | -0.47 | -0.33 |
| STD    | 1.50  | 0.40  | 1.38  | 1.64  | 1.43  | 0.37  | 0.25  |

\*STD standard deviation

**Table S7. Geo-accumulation Index (Igeo) in surface soils of La Mata, Dominican Republic, using World average shale (WAS) as background.**

| <b>Sample</b> | <b>Mn</b>    | <b>Cr</b>   | <b>Cu</b>    | <b>Ni</b>    | <b>Zn</b>    | <b>Pb</b>    | <b>As</b>    |
|---------------|--------------|-------------|--------------|--------------|--------------|--------------|--------------|
| LM01          | 1.41         | 2.25        | -0.42        | 0.81         | 1.42         | 0.42         | -1.79        |
| LM02          | 1.88         | 1.35        | -2.28        | -4.34        | 0.64         | 0.55         | -2.01        |
| LM03          | 1.44         | 2.32        | -0.84        | -0.83        | 1.86         | 0.11         | -1.96        |
| LM04          | 2.53         | 2.32        | -3.40        | -0.47        | 1.45         | 0.20         | -1.89        |
| LM05          | 1.91         | 1.66        | -1.00        | -4.16        | -2.26        | 0.43         | -2.02        |
| LM06          | -2.91        | 1.66        | -0.56        | -3.09        | -0.84        | 0.65         | -2.09        |
| LM07          | 1.49         | 2.38        | -0.90        | -0.85        | 2.02         | -0.02        | -1.83        |
| LM08          | -0.94        | 1.61        | -0.83        | -2.75        | 0.89         | 0.42         | -1.95        |
| LM09          | -2.28        | 1.44        | -0.58        | -4.80        | -1.50        | 0.63         | -2.01        |
| LM10          | -1.68        | 1.21        | -1.03        | -3.31        | -0.26        | 0.33         | -2.06        |
| LM11          | -1.89        | 1.13        | -0.25        | -3.79        | 0.08         | 0.42         | -1.93        |
| LM12          | -1.19        | 1.25        | -1.33        | -3.51        | -0.13        | 0.45         | -2.02        |
| LM13          | -1.52        | 1.30        | -0.42        | -4.99        | -0.87        | 0.15         | -2.05        |
| LM14          | -2.49        | 1.12        | -1.09        | -3.04        | -1.69        | 0.15         | -1.93        |
| LM15          | -1.09        | 1.26        | -0.26        | -2.99        | -2.65        | 0.19         | -2.05        |
| LM16          | -1.04        | 1.31        | 0.11         | -3.52        | 1.15         | 0.23         | -2.07        |
| LM17          | 0.26         | 1.41        | -0.86        | –            | 0.54         | 0.50         | -1.78        |
| LM18          | 0.73         | 1.57        | -0.60        | -3.47        | -0.92        | 0.65         | -1.97        |
| LM19          | 1.00         | 1.08        | -0.37        | -2.40        | 0.56         | -0.33        | -1.89        |
| LM20          | -1.02        | 1.29        | -0.50        | -3.11        | 0.94         | 0.51         | -1.93        |
| LM21          | -1.23        | 1.64        | -5.08        | –            | -1.64        | -0.05        | -1.98        |
| LM22          | 0.17         | 1.52        | -1.85        | –            | -2.17        | 0.96         | -2.77        |
| LM23          | 0.32         | 1.49        | -2.58        | –            | -2.32        | 1.25         | -2.93        |
| LM24          | 0.59         | 1.49        | -3.16        | –            | -2.28        | 1.16         | -2.44        |
| LM25          | 0.67         | 1.41        | -1.12        | –            | 1.84         | 1.17         | -1.82        |
| LM26          | -1.44        | 1.39        | -5.08        | –            | -0.54        | 0.81         | -1.94        |
| LM27          | -2.10        | 2.03        | -3.33        | –            | 0.50         | 0.75         | -1.99        |
| LM28          | -1.50        | 2.39        | -2.06        | –            | 1.01         | 0.71         | -2.02        |
| LM29          | -1.40        | 1.98        | -0.35        | –            | 0.74         | 0.41         | -1.78        |
| LM30          | 0.85         | 1.89        | -0.96        | 0.21         | 1.92         | 0.53         | -1.94        |
| LM31          | 0.30         | 1.22        | -0.33        | –            | -1.14        | 0.63         | -2.09        |
| LM32          | -2.35        | 1.86        | -1.18        | –            | 0.40         | -0.16        | -2.01        |
| <b>MIN</b>    | <b>-2.91</b> | <b>1.08</b> | <b>-5.08</b> | <b>-4.99</b> | <b>-2.65</b> | <b>-0.33</b> | <b>-2.93</b> |
| <b>MAX</b>    | <b>2.53</b>  | <b>2.39</b> | <b>0.11</b>  | <b>0.81</b>  | <b>2.02</b>  | <b>1.25</b>  | <b>-1.78</b> |
| <b>MEAN</b>   | <b>-0.39</b> | <b>1.60</b> | <b>-1.39</b> | <b>-2.72</b> | <b>-0.10</b> | <b>0.46</b>  | <b>-2.03</b> |
| <b>STD</b>    | <b>1.50</b>  | <b>0.40</b> | <b>1.34</b>  | <b>1.64</b>  | <b>1.43</b>  | <b>0.37</b>  | <b>0.25</b>  |

\*STD standard deviation

**Table S8. Enrichment Factor (EF) in surface soils of La Mata, Dominican Republic, using LB as background.**

| <b>Sample</b> | <b>Mn</b>   | <b>Cr</b>   | <b>Cu</b>   | <b>Ni</b>    | <b>Zn</b>   | <b>Pb</b>   | <b>As</b>   |
|---------------|-------------|-------------|-------------|--------------|-------------|-------------|-------------|
| LM01          | 2.61        | 1.65        | 1.99        | 20.11        | 1.89        | 1.12        | 1.50        |
| LM02          | 2.67        | 0.65        | 0.41        | 0.42         | 0.82        | 0.91        | 0.95        |
| LM03          | 2.16        | 1.40        | 1.21        | 5.23         | 2.08        | 0.73        | 1.08        |
| LM04          | 3.17        | 0.97        | 0.14        | 4.63         | 1.08        | 0.54        | 0.79        |
| LM05          | 2.55        | 0.76        | 0.92        | 0.44         | 0.10        | 0.78        | 0.89        |
| LM06          | 0.11        | 0.89        | 1.47        | 1.09         | 0.32        | 1.07        | 0.99        |
| LM07          | 2.21        | 1.43        | 1.14        | 5.07         | 2.29        | 0.66        | 1.17        |
| LM08          | 0.39        | 0.80        | 1.15        | 1.30         | 1.01        | 0.85        | 1.03        |
| LM09          | 0.15        | 0.71        | 1.35        | 0.31         | 0.19        | 0.98        | 0.97        |
| LM10          | 0.27        | 0.69        | 1.13        | 1.00         | 0.52        | 0.91        | 1.08        |
| LM11          | 0.23        | 0.65        | 1.94        | 0.72         | 0.65        | 0.97        | 1.19        |
| LM12          | 0.27        | 0.53        | 0.68        | 0.64         | 0.41        | 0.73        | 0.82        |
| LM13          | 0.22        | 0.56        | 1.31        | 0.24         | 0.25        | 0.61        | 0.82        |
| LM14          | 0.14        | 0.58        | 0.98        | 1.09         | 0.17        | 0.72        | 1.06        |
| LM15          | 0.38        | 0.68        | 1.84        | 1.19         | 0.09        | 0.79        | 1.04        |
| LM16          | 0.35        | 0.64        | 2.14        | 0.74         | 1.17        | 0.73        | 0.92        |
| LM17          | 0.74        | 0.57        | 0.92        | 0.00         | 0.64        | 0.74        | 0.95        |
| LM18          | 0.88        | 0.56        | 0.96        | 0.56         | 0.20        | 0.71        | 0.72        |
| LM19          | 1.45        | 0.54        | 1.52        | 1.60         | 0.77        | 0.49        | 1.03        |
| LM20          | 0.26        | 0.46        | 1.02        | 0.72         | 0.74        | 0.65        | 0.74        |
| LM21          | 0.32        | 0.83        | 0.06        | 0.00         | 0.18        | 0.62        | 1.02        |
| LM22          | 0.72        | 0.64        | 0.48        | 0.00         | 0.10        | 1.06        | 0.49        |
| LM23          | 0.77        | 0.61        | 0.28        | 0.00         | 0.09        | 1.26        | 0.43        |
| LM24          | 0.78        | 0.51        | 0.16        | 0.00         | 0.08        | 0.99        | 0.51        |
| LM25          | 0.89        | 0.52        | 0.70        | 0.00         | 1.44        | 1.07        | 0.84        |
| LM26          | 0.28        | 0.70        | 0.06        | 0.00         | 0.38        | 1.13        | 1.05        |
| LM27          | 0.18        | 1.10        | 0.21        | 0.00         | 0.78        | 1.10        | 1.02        |
| LM28          | 0.30        | 1.56        | 0.55        | 0.00         | 1.22        | 1.17        | 1.10        |
| LM29          | 0.31        | 1.14        | 1.75        | 0.00         | 0.99        | 0.93        | 1.26        |
| LM30          | 1.42        | 1.03        | 1.10        | 10.67        | 2.14        | 0.97        | 1.09        |
| LM31          | 0.94        | 0.62        | 1.65        | 0.00         | 0.25        | 1.00        | 0.95        |
| LM32          | 0.21        | 1.37        | 1.30        | 0.00         | 1.03        | 0.82        | 1.42        |
| <b>MIN</b>    | <b>0.11</b> | <b>0.46</b> | <b>0.06</b> | <b>0.00</b>  | <b>0.08</b> | <b>0.49</b> | <b>0.43</b> |
| <b>MAX</b>    | <b>3.17</b> | <b>1.65</b> | <b>2.14</b> | <b>20.11</b> | <b>2.29</b> | <b>1.26</b> | <b>1.50</b> |
| <b>MEAN</b>   | <b>0.89</b> | <b>0.82</b> | <b>1.02</b> | <b>1.81</b>  | <b>0.75</b> | <b>0.87</b> | <b>0.97</b> |
| <b>STD</b>    | <b>0.9</b>  | <b>0.3</b>  | <b>0.6</b>  | <b>4.0</b>   | <b>0.6</b>  | <b>0.2</b>  | <b>0.2</b>  |

\*STD standard deviation



**Table S9. Enrichment Factor (EF) in surface soils of La Mata, Dominican Republic, using World average shale (WAS) as background.**

| Sample | Mn   | Cr   | Cu   | Ni   | Zn   | Pb   | As   |
|--------|------|------|------|------|------|------|------|
| LM01   | 3.53 | 6.33 | 0.99 | 2.33 | 3.55 | 1.78 | 0.38 |
| LM02   | 3.61 | 2.51 | 0.20 | 0.05 | 1.53 | 1.44 | 0.24 |
| LM03   | 2.92 | 5.36 | 0.60 | 0.61 | 3.91 | 1.16 | 0.28 |
| LM04   | 4.29 | 3.72 | 0.07 | 0.54 | 2.04 | 0.86 | 0.20 |
| LM05   | 3.45 | 2.92 | 0.46 | 0.05 | 0.19 | 1.24 | 0.23 |
| LM06   | 0.14 | 3.43 | 0.73 | 0.13 | 0.60 | 1.70 | 0.25 |
| LM07   | 2.98 | 5.51 | 0.57 | 0.59 | 4.30 | 1.04 | 0.30 |
| LM08   | 0.53 | 3.09 | 0.57 | 0.15 | 1.89 | 1.36 | 0.26 |
| LM09   | 0.21 | 2.72 | 0.67 | 0.04 | 0.35 | 1.55 | 0.25 |
| LM10   | 0.36 | 2.67 | 0.56 | 0.12 | 0.97 | 1.45 | 0.28 |
| LM11   | 0.31 | 2.51 | 0.97 | 0.08 | 1.22 | 1.54 | 0.30 |
| LM12   | 0.37 | 2.03 | 0.34 | 0.07 | 0.78 | 1.16 | 0.21 |
| LM13   | 0.30 | 2.14 | 0.65 | 0.03 | 0.48 | 0.97 | 0.21 |
| LM14   | 0.18 | 2.24 | 0.49 | 0.13 | 0.32 | 1.15 | 0.27 |
| LM15   | 0.51 | 2.62 | 0.91 | 0.14 | 0.17 | 1.25 | 0.26 |
| LM16   | 0.48 | 2.46 | 1.06 | 0.09 | 2.20 | 1.16 | 0.23 |
| LM17   | 1.00 | 2.20 | 0.46 | 0.00 | 1.20 | 1.18 | 0.24 |
| LM18   | 1.20 | 2.14 | 0.48 | 0.07 | 0.38 | 1.13 | 0.18 |
| LM19   | 1.96 | 2.06 | 0.76 | 0.18 | 1.44 | 0.78 | 0.26 |
| LM20   | 0.35 | 1.75 | 0.51 | 0.08 | 1.38 | 1.03 | 0.19 |
| LM21   | 0.44 | 3.19 | 0.03 | 0.00 | 0.33 | 0.99 | 0.26 |
| LM22   | 0.97 | 2.46 | 0.24 | 0.00 | 0.19 | 1.68 | 0.13 |
| LM23   | 1.04 | 2.35 | 0.14 | 0.00 | 0.17 | 1.99 | 0.11 |
| LM24   | 1.05 | 1.98 | 0.08 | 0.00 | 0.14 | 1.57 | 0.13 |
| LM25   | 1.20 | 2.00 | 0.35 | 0.00 | 2.71 | 1.70 | 0.21 |
| LM26   | 0.38 | 2.70 | 0.03 | 0.00 | 0.70 | 1.80 | 0.27 |
| LM27   | 0.24 | 4.24 | 0.10 | 0.00 | 1.46 | 1.74 | 0.26 |
| LM28   | 0.40 | 5.99 | 0.27 | 0.00 | 2.30 | 1.86 | 0.28 |
| LM29   | 0.42 | 4.37 | 0.87 | 0.00 | 1.85 | 1.47 | 0.32 |
| LM30   | 1.92 | 3.96 | 0.55 | 1.24 | 4.02 | 1.54 | 0.28 |
| LM31   | 1.27 | 2.40 | 0.82 | 0.00 | 0.47 | 1.59 | 0.24 |
| LM32   | 0.29 | 5.28 | 0.65 | 0.00 | 1.93 | 1.31 | 0.36 |
| MIN    | 0.14 | 1.75 | 0.03 | 0.00 | 0.14 | 0.78 | 0.11 |
| MAX    | 4.29 | 6.33 | 1.06 | 2.33 | 4.30 | 1.99 | 0.38 |
| MEAN   | 1.20 | 3.17 | 0.51 | 0.21 | 1.41 | 1.38 | 0.25 |
| STD    | 1.2  | 1.3  | 0.3  | 0.5  | 1.2  | 0.3  | 0.1  |

\*STD standard deviation

**Table S10. Single Pollution Index (PI) in surface soils of La Mata, Dominican Republic, using LB as background.**

| <b>Sample</b> | <b>Mn</b>   | <b>Cr</b>   | <b>Cu</b>   | <b>Ni</b>   | <b>Zn</b>   | <b>Pb</b>   | <b>As</b>   |
|---------------|-------------|-------------|-------------|-------------|-------------|-------------|-------------|
| LM01          | 0.05        | 0.01        | 0.00        | 0.00        | 0.01        | 0.00        | 0.00        |
| LM02          | 2.90        | 0.81        | 0.41        | 0.26        | 1.11        | 1.03        | 1.00        |
| LM03          | 2.14        | 1.58        | 1.12        | 2.92        | 2.59        | 0.76        | 1.04        |
| LM04          | 4.54        | 1.58        | 0.19        | 3.73        | 1.95        | 0.81        | 1.09        |
| LM05          | 2.96        | 1.00        | 0.99        | 0.29        | 0.15        | 0.95        | 0.99        |
| LM06          | 0.11        | 1.00        | 1.35        | 0.61        | 0.40        | 1.10        | 0.95        |
| LM07          | 2.22        | 1.64        | 1.07        | 2.86        | 2.89        | 0.69        | 1.14        |
| LM08          | 0.41        | 0.96        | 1.12        | 0.77        | 1.32        | 0.94        | 1.04        |
| LM09          | 0.16        | 0.86        | 1.34        | 0.19        | 0.25        | 1.09        | 1.00        |
| LM10          | 0.25        | 0.73        | 0.97        | 0.52        | 0.60        | 0.88        | 0.97        |
| LM11          | 0.21        | 0.69        | 1.68        | 0.37        | 0.75        | 0.94        | 1.06        |
| LM12          | 0.34        | 0.76        | 0.79        | 0.45        | 0.65        | 0.96        | 0.99        |
| LM13          | 0.27        | 0.78        | 1.49        | 0.16        | 0.39        | 0.78        | 0.97        |
| LM14          | 0.14        | 0.69        | 0.94        | 0.63        | 0.22        | 0.78        | 1.06        |
| LM15          | 0.37        | 0.76        | 1.66        | 0.65        | 0.11        | 0.80        | 0.97        |
| LM16          | 0.38        | 0.79        | 2.15        | 0.45        | 1.58        | 0.83        | 0.96        |
| LM17          | 0.95        | 0.84        | 1.10        | 0.00        | 1.03        | 0.99        | 1.17        |
| LM18          | 1.31        | 0.94        | 1.31        | 0.47        | 0.38        | 1.10        | 1.03        |
| LM19          | 1.58        | 0.67        | 1.54        | 0.98        | 1.05        | 0.56        | 1.09        |
| LM20          | 0.39        | 0.77        | 1.41        | 0.60        | 1.37        | 1.00        | 1.06        |
| LM21          | 0.34        | 0.99        | 0.06        | 0.00        | 0.23        | 0.68        | 1.02        |
| Lm22          | 0.89        | 0.91        | 0.55        | 0.00        | 0.16        | 1.37        | 0.59        |
| LM23          | 0.99        | 0.89        | 0.33        | 0.00        | 0.14        | 1.68        | 0.53        |
| LM24          | 1.18        | 0.89        | 0.22        | 0.00        | 0.15        | 1.57        | 0.75        |
| LM25          | 1.26        | 0.84        | 0.92        | 0.00        | 2.55        | 1.58        | 1.15        |
| LM26          | 0.29        | 0.83        | 0.06        | 0.00        | 0.49        | 1.23        | 1.05        |
| LM27          | 0.18        | 1.30        | 0.20        | 0.00        | 1.01        | 1.18        | 1.01        |
| LM28          | 0.28        | 1.67        | 0.48        | 0.00        | 1.44        | 1.15        | 0.99        |
| LM29          | 0.30        | 1.25        | 1.57        | 0.00        | 1.19        | 0.93        | 1.17        |
| LM30          | 1.42        | 1.18        | 1.02        | 6.00        | 2.69        | 1.01        | 1.05        |
| LM31          | 0.97        | 0.74        | 1.59        | 0.00        | 0.32        | 1.08        | 0.95        |
| LM32          | 0.15        | 1.15        | 0.88        | 0.00        | 0.94        | 0.63        | 1.00        |
| <b>MIN</b>    | <b>0.05</b> | <b>0.01</b> | <b>0.00</b> | <b>0.00</b> | <b>0.01</b> | <b>0.00</b> | <b>0.00</b> |
| <b>MAX</b>    | <b>4.54</b> | <b>1.67</b> | <b>2.15</b> | <b>6.00</b> | <b>2.89</b> | <b>1.68</b> | <b>1.17</b> |
| <b>MEAN</b>   | <b>0.94</b> | <b>0.95</b> | <b>0.95</b> | <b>0.72</b> | <b>0.94</b> | <b>0.97</b> | <b>0.96</b> |
| <b>STD</b>    | <b>1.04</b> | <b>0.34</b> | <b>0.57</b> | <b>1.33</b> | <b>0.83</b> | <b>0.32</b> | <b>0.22</b> |

\*STD standard deviation

**Table S11. Single Pollution Index (PI) in surface soils of La Mata, Dominican Republic, using WAS as background.**

| <b>Sample</b> | <b>Mn</b>   | <b>Cr</b>   | <b>Cu</b>   | <b>Ni</b>   | <b>Zn</b>   | <b>Pb</b>   | <b>As</b>   |
|---------------|-------------|-------------|-------------|-------------|-------------|-------------|-------------|
| LM01          | 4.00        | 7.16        | 1.12        | 2.64        | 4.02        | 2.01        | 0.43        |
| LM02          | 5.51        | 3.83        | 0.31        | 0.07        | 2.34        | 2.20        | 0.37        |
| LM03          | 4.07        | 7.48        | 0.84        | 0.85        | 5.45        | 1.62        | 0.38        |
| LM04          | 8.64        | 7.48        | 0.14        | 1.08        | 4.10        | 1.73        | 0.41        |
| LM05          | 5.63        | 4.75        | 0.75        | 0.08        | 0.31        | 2.03        | 0.37        |
| LM06          | 0.20        | 4.75        | 1.01        | 0.18        | 0.84        | 2.36        | 0.35        |
| LM07          | 4.22        | 7.78        | 0.80        | 0.83        | 6.08        | 1.48        | 0.42        |
| LM08          | 0.78        | 4.56        | 0.85        | 0.22        | 2.78        | 2.00        | 0.39        |
| LM09          | 0.31        | 4.08        | 1.01        | 0.05        | 0.53        | 2.32        | 0.37        |
| LM10          | 0.47        | 3.46        | 0.73        | 0.15        | 1.26        | 1.88        | 0.36        |
| LM11          | 0.41        | 3.27        | 1.26        | 0.11        | 1.59        | 2.01        | 0.39        |
| LM12          | 0.66        | 3.58        | 0.60        | 0.13        | 1.37        | 2.05        | 0.37        |
| LM13          | 0.52        | 3.69        | 1.12        | 0.05        | 0.82        | 1.66        | 0.36        |
| LM14          | 0.27        | 3.25        | 0.70        | 0.18        | 0.46        | 1.67        | 0.39        |
| LM15          | 0.70        | 3.59        | 1.25        | 0.19        | 0.24        | 1.71        | 0.36        |
| LM16          | 0.73        | 3.73        | 1.61        | 0.13        | 3.34        | 1.77        | 0.36        |
| LM17          | 1.80        | 3.97        | 0.83        | 0.00        | 2.17        | 2.12        | 0.44        |
| LM18          | 2.48        | 4.45        | 0.99        | 0.14        | 0.80        | 2.35        | 0.38        |
| LM19          | 3.00        | 3.17        | 1.16        | 0.28        | 2.21        | 1.20        | 0.41        |
| LM20          | 0.74        | 3.66        | 1.06        | 0.17        | 2.89        | 2.14        | 0.39        |
| LM21          | 0.64        | 4.68        | 0.04        | 0.00        | 0.48        | 1.45        | 0.38        |
| Lm22          | 1.69        | 4.29        | 0.42        | 0.00        | 0.33        | 2.93        | 0.22        |
| LM23          | 1.87        | 4.22        | 0.25        | 0.00        | 0.30        | 3.58        | 0.20        |
| LM24          | 2.25        | 4.22        | 0.17        | 0.00        | 0.31        | 3.35        | 0.28        |
| LM25          | 2.39        | 3.98        | 0.69        | 0.00        | 5.38        | 3.38        | 0.43        |
| LM26          | 0.55        | 3.94        | 0.04        | 0.00        | 1.03        | 2.63        | 0.39        |
| LM27          | 0.35        | 6.15        | 0.15        | 0.00        | 2.12        | 2.53        | 0.38        |
| LM28          | 0.53        | 7.88        | 0.36        | 0.00        | 3.02        | 2.45        | 0.37        |
| LM29          | 0.57        | 5.90        | 1.18        | 0.00        | 2.51        | 1.99        | 0.44        |
| LM30          | 2.70        | 5.57        | 0.77        | 1.74        | 5.66        | 2.17        | 0.39        |
| LM31          | 1.85        | 3.49        | 1.20        | 0.00        | 0.68        | 2.32        | 0.35        |
| LM32          | 0.29        | 5.43        | 0.66        | 0.00        | 1.98        | 1.34        | 0.37        |
| <b>MIN</b>    | <b>0.20</b> | <b>3.17</b> | <b>0.04</b> | <b>0.00</b> | <b>0.24</b> | <b>1.20</b> | <b>0.20</b> |
| <b>MAX</b>    | <b>8.64</b> | <b>7.88</b> | <b>1.61</b> | <b>2.64</b> | <b>6.08</b> | <b>3.58</b> | <b>0.44</b> |
| <b>MEAN</b>   | <b>1.96</b> | <b>4.75</b> | <b>0.74</b> | <b>0.31</b> | <b>2.16</b> | <b>2.16</b> | <b>0.37</b> |
| <b>STD</b>    | <b>2.03</b> | <b>1.47</b> | <b>0.42</b> | <b>0.59</b> | <b>1.79</b> | <b>0.57</b> | <b>0.05</b> |

\*STD standard deviation

**Table S12. The potential Ecological risk factor ( $E_r^i$ ) in surface soils of La Mata, Dominican Republic, using LB as background.**

| Sample | Mn    | Cr   | Cu   | Ni    | Zn    | Pb   | As    |
|--------|-------|------|------|-------|-------|------|-------|
| LM01   | 4.90  | 3.09 | 1.87 | 18.87 | 8.89  | 5.26 | 14.08 |
| LM02   | 6.75  | 1.65 | 0.51 | 0.53  | 5.18  | 5.74 | 12.08 |
| LM03   | 5.00  | 3.23 | 1.40 | 6.06  | 12.05 | 4.22 | 12.50 |
| LM04   | 10.59 | 3.23 | 0.24 | 7.74  | 9.06  | 4.51 | 13.17 |
| LM05   | 6.90  | 2.05 | 1.25 | 0.60  | 0.69  | 5.29 | 12.00 |
| LM06   | 0.25  | 2.05 | 1.69 | 1.26  | 1.85  | 6.17 | 11.42 |
| LM07   | 5.17  | 3.36 | 1.34 | 5.94  | 13.43 | 3.86 | 13.75 |
| LM08   | 0.96  | 1.97 | 1.41 | 1.59  | 6.15  | 5.23 | 12.58 |
| LM09   | 0.38  | 1.76 | 1.68 | 0.38  | 1.18  | 6.07 | 12.08 |
| LM10   | 0.58  | 1.49 | 1.22 | 1.08  | 2.78  | 4.92 | 11.67 |
| LM11   | 0.50  | 1.41 | 2.10 | 0.77  | 3.51  | 5.25 | 12.83 |
| LM12   | 0.80  | 1.54 | 1.00 | 0.94  | 3.02  | 5.35 | 12.00 |
| LM13   | 0.64  | 1.59 | 1.86 | 0.34  | 1.81  | 4.34 | 11.75 |
| LM14   | 0.33  | 1.40 | 1.17 | 1.31  | 1.03  | 4.35 | 12.75 |
| LM15   | 0.86  | 1.55 | 2.08 | 1.35  | 0.53  | 4.47 | 11.75 |
| LM16   | 0.89  | 1.61 | 2.69 | 0.94  | 7.37  | 4.61 | 11.58 |
| LM17   | 2.21  | 1.71 | 1.38 | 0.00  | 4.80  | 5.55 | 14.17 |
| LM18   | 3.05  | 1.92 | 1.65 | 0.97  | 1.76  | 6.14 | 12.42 |
| LM19   | 3.68  | 1.37 | 1.94 | 2.03  | 4.89  | 3.12 | 13.17 |
| LM20   | 0.91  | 1.58 | 1.77 | 1.25  | 6.38  | 5.59 | 12.75 |
| LM21   | 0.79  | 2.02 | 0.07 | 0.00  | 1.06  | 3.78 | 12.33 |
| LM22   | 2.07  | 1.85 | 0.69 | 0.00  | 0.74  | 7.65 | 7.13  |
| LM23   | 2.30  | 1.82 | 0.42 | 0.00  | 0.66  | 9.36 | 6.41  |
| LM24   | 2.76  | 1.82 | 0.28 | 0.00  | 0.68  | 8.76 | 9.00  |
| LM25   | 2.93  | 1.72 | 1.15 | 0.00  | 11.88 | 8.84 | 13.83 |
| LM26   | 0.68  | 1.70 | 0.07 | 0.00  | 2.27  | 6.87 | 12.67 |
| LM27   | 0.43  | 2.65 | 0.25 | 0.00  | 4.68  | 6.61 | 12.25 |
| LM28   | 0.65  | 3.40 | 0.60 | 0.00  | 6.68  | 6.40 | 12.00 |
| LM29   | 0.70  | 2.55 | 1.97 | 0.00  | 5.53  | 5.20 | 14.17 |
| LM30   | 3.31  | 2.41 | 1.28 | 12.44 | 12.50 | 5.66 | 12.67 |
| LM31   | 2.27  | 1.51 | 1.99 | 0.00  | 1.50  | 6.05 | 11.42 |
| LM32   | 0.36  | 2.34 | 1.11 | 0.00  | 4.38  | 3.51 | 12.08 |
| MIN    | 0.25  | 1.37 | 0.07 | 0.00  | 0.53  | 3.12 | 6.41  |
| MAX    | 10.59 | 3.40 | 2.69 | 18.87 | 13.43 | 9.36 | 14.17 |
| MEAN   | 2.33  | 2.04 | 1.25 | 2.07  | 4.65  | 5.59 | 12.08 |
| STD    | 2.44  | 0.62 | 0.68 | 4.11  | 3.88  | 1.50 | 1.72  |

\*STD standard deviation

THE POTENTIAL ECOLOGICAL RISK INDEX (RI)

$$RI = \sum E_r^i \text{ mean} = [2.33 (\text{Mn}) + 2.04 (\text{Cr}) + 1.25 (\text{Cu}) + 2.07 (\text{Ni}) + 4.65 (\text{Zn}) + 5.59 (\text{Pb}) + 12.08 (\text{As})] = 30.02$$

**Table S13. The potential Ecological risk factor ( $E_r^i$ ) in surface soils of La Mata, Dominican Republic, using WAS as background.**

| Sample | Mn   | Cr   | Cu   | Ni   | Zn   | Pb   | As   |
|--------|------|------|------|------|------|------|------|
| LM01   | 4.00 | 7.16 | 1.12 | 2.64 | 4.02 | 2.01 | 0.43 |
| LM02   | 5.51 | 3.83 | 0.31 | 0.07 | 2.34 | 2.20 | 0.37 |
| LM03   | 4.07 | 7.48 | 0.84 | 0.85 | 5.45 | 1.62 | 0.38 |
| LM04   | 8.64 | 7.48 | 0.14 | 1.08 | 4.10 | 1.73 | 0.41 |
| LM05   | 5.63 | 4.75 | 0.75 | 0.08 | 0.31 | 2.03 | 0.37 |
| LM06   | 0.20 | 4.75 | 1.01 | 0.18 | 0.84 | 2.36 | 0.35 |
| LM07   | 4.22 | 7.78 | 0.80 | 0.83 | 6.08 | 1.48 | 0.42 |
| LM08   | 0.78 | 4.56 | 0.85 | 0.22 | 2.78 | 2.00 | 0.39 |
| LM09   | 0.31 | 4.08 | 1.01 | 0.05 | 0.53 | 2.32 | 0.37 |
| LM10   | 0.47 | 3.46 | 0.73 | 0.15 | 1.26 | 1.88 | 0.36 |
| LM11   | 0.41 | 3.27 | 1.26 | 0.11 | 1.59 | 2.01 | 0.39 |
| LM12   | 0.66 | 3.58 | 0.60 | 0.13 | 1.37 | 2.05 | 0.37 |
| LM13   | 0.52 | 3.69 | 1.12 | 0.05 | 0.82 | 1.66 | 0.36 |
| LM14   | 0.27 | 3.25 | 0.70 | 0.18 | 0.46 | 1.67 | 0.39 |
| LM15   | 0.70 | 3.59 | 1.25 | 0.19 | 0.24 | 1.71 | 0.36 |
| LM16   | 0.73 | 3.73 | 1.61 | 0.13 | 3.34 | 1.77 | 0.36 |
| LM17   | 1.80 | 3.97 | 0.83 | 0.00 | 2.17 | 2.12 | 0.44 |
| LM18   | 2.48 | 4.45 | 0.99 | 0.14 | 0.80 | 2.35 | 0.38 |
| LM19   | 3.00 | 3.17 | 1.16 | 0.28 | 2.21 | 1.20 | 0.41 |
| LM20   | 0.74 | 3.66 | 1.06 | 0.17 | 2.89 | 2.14 | 0.39 |
| LM21   | 0.64 | 4.68 | 0.04 | 0.00 | 0.48 | 1.45 | 0.38 |
| LM22   | 1.69 | 4.29 | 0.42 | 0.00 | 0.33 | 2.93 | 0.22 |
| LM23   | 1.87 | 4.22 | 0.25 | 0.00 | 0.30 | 3.58 | 0.20 |
| LM24   | 2.25 | 4.22 | 0.17 | 0.00 | 0.31 | 3.35 | 0.28 |
| LM25   | 2.39 | 3.98 | 0.69 | 0.00 | 5.38 | 3.38 | 0.43 |
| LM26   | 0.55 | 3.94 | 0.04 | 0.00 | 1.03 | 2.63 | 0.39 |
| LM27   | 0.35 | 6.15 | 0.15 | 0.00 | 2.12 | 2.53 | 0.38 |
| LM28   | 0.53 | 7.88 | 0.36 | 0.00 | 3.02 | 2.45 | 0.37 |
| LM29   | 0.57 | 5.90 | 1.18 | 0.00 | 2.51 | 1.99 | 0.44 |
| LM30   | 2.70 | 5.57 | 0.77 | 1.74 | 5.66 | 2.17 | 0.39 |
| LM31   | 1.85 | 3.49 | 1.20 | 0.00 | 0.68 | 2.32 | 0.35 |
| LM32   | 0.29 | 5.43 | 0.66 | 0.00 | 1.98 | 1.34 | 0.37 |
| MIN    | 0.20 | 3.17 | 0.04 | 0.00 | 0.24 | 1.20 | 0.20 |
| MAX    | 8.64 | 7.88 | 1.61 | 2.64 | 6.08 | 3.58 | 0.44 |
| MEAN   | 1.90 | 4.73 | 0.75 | 0.29 | 2.11 | 2.14 | 0.37 |
| STD    | 1.99 | 1.44 | 0.41 | 0.57 | 1.75 | 0.57 | 0.05 |

\*STD standard deviation

THE POTENTIAL ECOLOGICAL RISK INDEX (RI)

$$RI = \sum E_r^i \text{ mean} = [1.90 (\text{Mn}) + 4.73 (\text{Cr}) + 0.75 (\text{Cu}) + 0.29 (\text{Ni}) + 2.11 (\text{Zn}) + 2.14 (\text{Pb}) + 0.37 (\text{As})] = 12.29$$
